# Supplementary material
Source: PubMed Central journal article supplement (PMC8595574)
Supplement: NIHMS1713726-supplement-1.pdf [file NIHMS1713726-supplement-1.pdf]

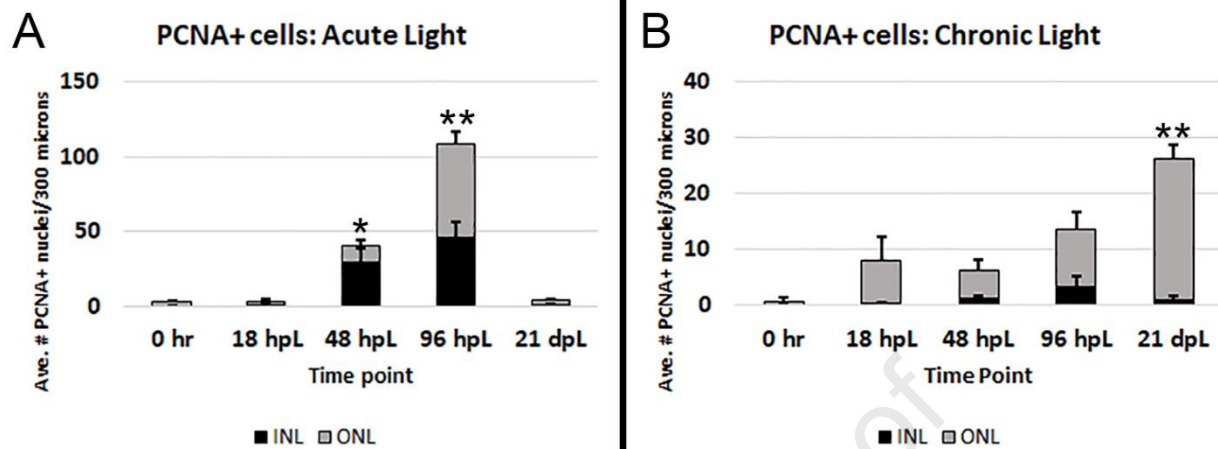

### Supplemental Material

**Suppl. Fig. 1. Quantification of PCNA+ cells in acute and chronic light models.** A) Graphic representation of the average number of PCNA+ cells in the inner nuclear layer (INL) and outer nuclear layer (ONL) within a linear distance of 300 microns of the central dorsal retina of acute light-treated retinas. B) Graphic representation of the average number of PCNA+ cells in the INL and ONL within a linear distance of 300 microns of the central dorsal retina of chronic light-treated retinas. Note that scales are different between panel A and B. Asterisks represent significant difference from 0 hr control based on one-way ANOVA analysis followed by a post-hoc Tukey's test using the total number of PCNA+ cells (INL + ONL) at each time point (\* =  $p < 0.05$ ; \*\* =  $p < 0.01$ ).

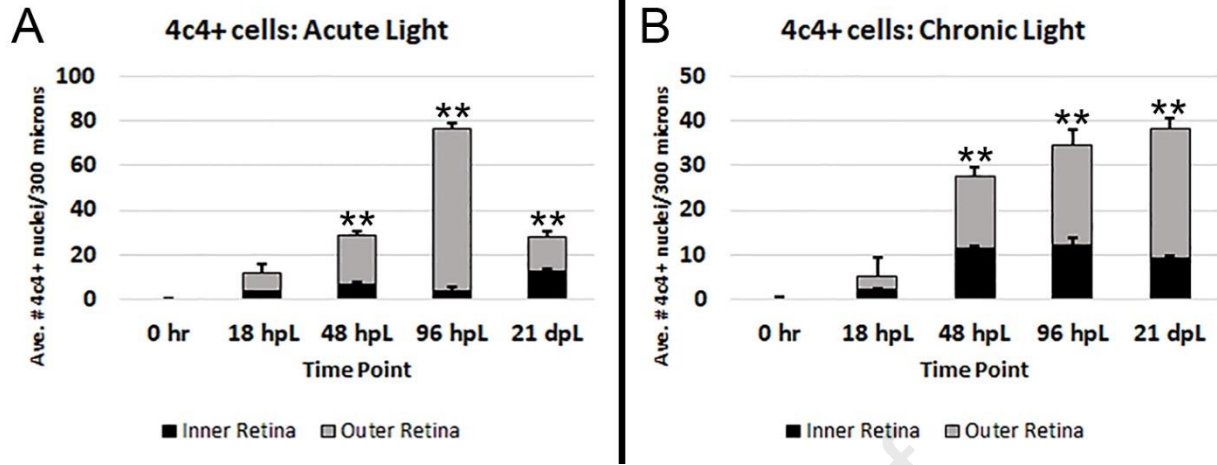

**Suppl. Fig. 2. Quantification of 4c4+ cells in acute and chronic light models.** A) Graphic representation of the average number of 4c4+ cells in the inner nuclear layer (INL) and outer nuclear layer (ONL) within a linear distance of 300 microns of the central dorsal retina of acute light-treated retinas. B) Graphic representation of the average number of 4c4+ cells in the INL and ONL within a linear distance of 300 microns of the central dorsal retina of chronic light-treated retinas. Note that scales are different between panel A and B. Asterisks represent significant difference from 0 hr control based on one-way ANOVA analysis followed by a post-hoc Tukey's test using the total number of 4c4+ cells (INL + ONL) at each time point (\*\* =  $p < 0.01$ ).
